# Supplementary material
Source: publisher figshare collection journal article supplement (https://acs.figshare.com/ndownloader/files/4970167)
Supplement: Supplementary file 1 [file 4970167]

## Sheet: 151112_transitions_newRT_FL23_0
parent	product	SRM collision energy	start time	stop time	name (peptide sequence)	protein ID	ion	charge
481.769	848.488	17.4	20.14	24.14	NVQVFVEK	sp|A0T0M8|PSAA_THAPS	y7
481.769	749.419	17.4	20.14	24.14	NVQVFVEK	sp|A0T0M8|PSAA_THAPS	y6	2
481.769	621.361	17.4	20.14	24.14	NVQVFVEK	sp|A0T0M8|PSAA_THAPS	y5	3
481.769	522.292	17.4	20.14	24.14	NVQVFVEK	sp|A0T0M8|PSAA_THAPS	y4	1
484.24	781.409	17.4	15.42	19.42	DAVETSFAK	sp|A0T0M8|PSAA_THAPS	y7	3
484.24	682.341	17.4	15.42	19.42	DAVETSFAK	sp|A0T0M8|PSAA_THAPS	y6	1
484.24	553.298	17.4	15.42	19.42	DAVETSFAK	sp|A0T0M8|PSAA_THAPS	y5	2
484.24	452.25	17.4	15.42	19.42	DAVETSFAK	sp|A0T0M8|PSAA_THAPS	y4
786.765	1235.69	32.2	45.43	49.43	LLDAGVSPQEIPLPHEFLINR	sp|A0T0M8|PSAA_THAPS	y10	1
786.765	1025.55	32.2	45.43	49.43	LLDAGVSPQEIPLPHEFLINR	sp|A0T0M8|PSAA_THAPS	y8	2
786.765	791.441	32.2	45.43	49.43	LLDAGVSPQEIPLPHEFLINR	sp|A0T0M8|PSAA_THAPS	y6	4
786.765	851.967	32.2	45.43	49.43	LLDAGVSPQEIPLPHEFLINR	sp|A0T0M8|PSAA_THAPS	y14	3
339.19	606.336	13.1	15.39	19.39	ANLGFR	sp|A0T0M8|PSAA_THAPS	y5	3
339.19	492.293	13.1	15.39	19.39	ANLGFR	sp|A0T0M8|PSAA_THAPS	y4	2
339.19	379.209	13.1	15.39	19.39	ANLGFR	sp|A0T0M8|PSAA_THAPS	y3	1
339.19	322.187	13.1	15.39	19.39	ANLGFR	sp|A0T0M8|PSAA_THAPS	y2
578.827	929.52	20.3	30.41	34.41	LNFAPTIQPR	sp|A0T0M8|PSAA_THAPS	y8	2
578.827	782.452	20.3	30.41	34.41	LNFAPTIQPR	sp|A0T0M8|PSAA_THAPS	y7	3
578.827	711.415	20.3	30.41	34.41	LNFAPTIQPR	sp|A0T0M8|PSAA_THAPS	y6	1
578.827	614.362	20.3	30.41	34.41	LNFAPTIQPR	sp|A0T0M8|PSAA_THAPS	y5	4
423.246	661.363	15.6	13.62	17.62	ALSITQGR	sp|A0T0M8|PSAA_THAPS	y6	1
423.246	574.331	15.6	13.62	17.62	ALSITQGR	sp|A0T0M8|PSAA_THAPS	y5	3
423.246	461.247	15.6	13.62	17.62	ALSITQGR	sp|A0T0M8|PSAA_THAPS	y4	2
423.246	360.199	15.6	13.62	17.62	ALSITQGR	sp|A0T0M8|PSAA_THAPS	y3
367.203	506.272	13.9	12.35	16.35	NLPAYR	sp|A0T0U5|PSAL_THAPS	y4	1
367.203	409.219	13.9	12.35	16.35	NLPAYR	sp|A0T0U5|PSAL_THAPS	y3	2
367.203	338.182	13.9	12.35	16.35	NLPAYR	sp|A0T0U5|PSAL_THAPS	y2
367.203	253.64	13.9	12.35	16.35	NLPAYR	sp|A0T0U5|PSAL_THAPS	y4
458.784	769.493	16.7	41.21	45.21	FGLTPLLR	sp|A0T0U5|PSAL_THAPS	y7	2
458.784	712.472	16.7	41.21	45.21	FGLTPLLR	sp|A0T0U5|PSAL_THAPS	y6	4
458.784	599.388	16.7	41.21	45.21	FGLTPLLR	sp|A0T0U5|PSAL_THAPS	y5	3
458.784	498.34	16.7	41.21	45.21	FGLTPLLR	sp|A0T0U5|PSAL_THAPS	y4	1
352.708	541.346	13.5	13.11	17.11	YPAVVR	tr|B8LEQ8|B8LEQ8_THAPS	y5	2
352.708	444.293	13.5	13.11	17.11	YPAVVR	tr|B8LEQ8|B8LEQ8_THAPS	y4	1
352.708	373.256	13.5	13.11	17.11	YPAVVR	tr|B8LEQ8|B8LEQ8_THAPS	y3	3
352.708	271.176	13.5	13.11	17.11	YPAVVR	tr|B8LEQ8|B8LEQ8_THAPS	y5
858.75	1162.64	34.9	45.64	49.64	FESVNYAGTNTNNFALDELVEVK	tr|B8LEQ8|B8LEQ8_THAPS	y10	3
858.75	1015.57	34.9	45.64	49.64	FESVNYAGTNTNNFALDELVEVK	tr|B8LEQ8|B8LEQ8_THAPS	y9	1
858.75	944.53	34.9	45.64	49.64	FESVNYAGTNTNNFALDELVEVK	tr|B8LEQ8|B8LEQ8_THAPS	y8	2
858.75	831.446	34.9	45.64	49.64	FESVNYAGTNTNNFALDELVEVK	tr|B8LEQ8|B8LEQ8_THAPS	y7
952.492	1248.62	31.5	40.49	44.49	IAALESAVNAGDFGAVAAEK	tr|B8CC14|B8CC14_THAPS	y13	4
952.492	1149.55	31.5	40.49	44.49	IAALESAVNAGDFGAVAAEK	tr|B8CC14|B8CC14_THAPS	y12	1
952.492	1035.51	31.5	40.49	44.49	IAALESAVNAGDFGAVAAEK	tr|B8CC14|B8CC14_THAPS	y11	3
952.492	964.473	31.5	40.49	44.49	IAALESAVNAGDFGAVAAEK	tr|B8CC14|B8CC14_THAPS	y10	2
740.893	1148.63	25.1	43.74	47.74	NAFILFNSGAIADK	tr|B8CC14|B8CC14_THAPS	y11	4
740.893	1035.55	25.1	43.74	47.74	NAFILFNSGAIADK	tr|B8CC14|B8CC14_THAPS	y10	2
740.893	922.463	25.1	43.74	47.74	NAFILFNSGAIADK	tr|B8CC14|B8CC14_THAPS	y9	1
740.893	775.394	25.1	43.74	47.74	NAFILFNSGAIADK	tr|B8CC14|B8CC14_THAPS	y8	3
552.812	875.51	19.5	35.4	39.4	QTNAIFAAIR	tr|B8CC14|B8CC14_THAPS	y8	3
552.812	761.467	19.5	35.4	39.4	QTNAIFAAIR	tr|B8CC14|B8CC14_THAPS	y7	4
552.812	690.43	19.5	35.4	39.4	QTNAIFAAIR	tr|B8CC14|B8CC14_THAPS	y6	2
552.812	577.346	19.5	35.4	39.4	QTNAIFAAIR	tr|B8CC14|B8CC14_THAPS	y5	1
402.2	716.361	15	7.57	11.57	SAYATYK	tr|B8CC14|B8CC14_THAPS	y6	4
402.2	645.324	15	7.57	11.57	SAYATYK	tr|B8CC14|B8CC14_THAPS	y5	1
402.2	482.261	15	7.57	11.57	SAYATYK	tr|B8CC14|B8CC14_THAPS	y4	3
402.2	411.224	15	7.57	11.57	SAYATYK	tr|B8CC14|B8CC14_THAPS	y3	2
755.31	1108.46	25.6	20.48	24.48	ESGQGYSNDYDFK	tr|B8CC14|B8CC14_THAPS	y9	2
755.31	1051.44	25.6	20.48	24.48	ESGQGYSNDYDFK	tr|B8CC14|B8CC14_THAPS	y8	4
755.31	888.373	25.6	20.48	24.48	ESGQGYSNDYDFK	tr|B8CC14|B8CC14_THAPS	y7	1
755.31	801.341	25.6	20.48	24.48	ESGQGYSNDYDFK	tr|B8CC14|B8CC14_THAPS	y6	3
512.295	821.488	18.3	26.65	30.65	TTLGTIYVR	tr|B8CC14|B8CC14_THAPS	y7	2
512.295	708.404	18.3	26.65	30.65	TTLGTIYVR	tr|B8CC14|B8CC14_THAPS	y6	1
512.295	651.382	18.3	26.65	30.65	TTLGTIYVR	tr|B8CC14|B8CC14_THAPS	y5	4
512.295	550.335	18.3	26.65	30.65	TTLGTIYVR	tr|B8CC14|B8CC14_THAPS	y4	3
649.861	1151.65	22.4	44.04	48.04	FGIFSPAVYVAK	tr|B8C035|B8C035_THAPS	y11	4
649.861	981.54	22.4	44.04	48.04	FGIFSPAVYVAK	tr|B8C035|B8C035_THAPS	y9	3
649.861	834.472	22.4	44.04	48.04	FGIFSPAVYVAK	tr|B8C035|B8C035_THAPS	y8	2
649.861	747.44	22.4	44.04	48.04	FGIFSPAVYVAK	tr|B8C035|B8C035_THAPS	y7	1
372.704	631.316	14.1	9.71	13.71	IGLGNDR	tr|B8C035|B8C035_THAPS	y6	1
372.704	574.294	14.1	9.71	13.71	IGLGNDR	tr|B8C035|B8C035_THAPS	y5	3
372.704	461.21	14.1	9.71	13.71	IGLGNDR	tr|B8C035|B8C035_THAPS	y4	2
372.704	404.189	14.1	9.71	13.71	IGLGNDR	tr|B8C035|B8C035_THAPS	y3	4
518.769	935.483	18.5	41.6	45.6	TNGDTLGFLV	tr|B8C035|B8C035_THAPS	y9
518.769	821.44	18.5	41.6	45.6	TNGDTLGFLV	tr|B8C035|B8C035_THAPS	y8
518.769	764.419	18.5	41.6	45.6	TNGDTLGFLV	tr|B8C035|B8C035_THAPS	y7
518.769	649.392	18.5	41.6	45.6	TNGDTLGFLV	tr|B8C035|B8C035_THAPS	y6
518.769	388.146	18.5	41.6	45.6	TNGDTLGFLV	tr|B8C035|B8C035_THAPS	b4
518.769	489.194	18.5	41.6	45.6	TNGDTLGFLV	tr|B8C035|B8C035_THAPS	b5
518.769	659.299	18.5	41.6	45.6	TNGDTLGFLV	tr|B8C035|B8C035_THAPS	b7
518.769	806.368	18.5	41.6	45.6	TNGDTLGFLV	tr|B8C035|B8C035_THAPS	b8
840.425	1306.61	28.1	47.63	51.63	IFLDALQSYYFSGR	tr|B8BZQ3|B8BZQ3_THAPS	y11	4
840.425	1120.54	28.1	47.63	51.63	IFLDALQSYYFSGR	tr|B8BZQ3|B8BZQ3_THAPS	y9	3
840.425	1007.46	28.1	47.63	51.63	IFLDALQSYYFSGR	tr|B8BZQ3|B8BZQ3_THAPS	y8	1
840.425	879.4	28.1	47.63	51.63	IFLDALQSYYFSGR	tr|B8BZQ3|B8BZQ3_THAPS	y7	2
702.872	1177.61	24	42.6	46.6	QVLNDAEFDLLK	tr|B8BZQ3|B8BZQ3_THAPS	y10	3
702.872	1064.53	24	42.6	46.6	QVLNDAEFDLLK	tr|B8BZQ3|B8BZQ3_THAPS	y9	2
702.872	835.456	24	42.6	46.6	QVLNDAEFDLLK	tr|B8BZQ3|B8BZQ3_THAPS	y7	1
702.872	764.419	24	42.6	46.6	QVLNDAEFDLLK	tr|B8BZQ3|B8BZQ3_THAPS	y6	4
570.327	863.499	20	38.5	42.5	YLAAVQAYLK	tr|B8BZQ3|B8BZQ3_THAPS	y8	1
570.327	792.461	20	38.5	42.5	YLAAVQAYLK	tr|B8BZQ3|B8BZQ3_THAPS	y7	2
570.327	721.424	20	38.5	42.5	YLAAVQAYLK	tr|B8BZQ3|B8BZQ3_THAPS	y6	4
570.327	622.356	20	38.5	42.5	YLAAVQAYLK	tr|B8BZQ3|B8BZQ3_THAPS	y5	3
715.43	1117.67	24.4	47.63	51.63	IAQLAFLGNIITR	tr|B8CFG5|B8CFG5_THAPS	y10	4
715.43	1004.59	24.4	47.63	51.63	IAQLAFLGNIITR	tr|B8CFG5|B8CFG5_THAPS	y9	2
715.43	933.552	24.4	47.63	51.63	IAQLAFLGNIITR	tr|B8CFG5|B8CFG5_THAPS	y8	1
715.43	786.483	24.4	47.63	51.63	IAQLAFLGNIITR	tr|B8CFG5|B8CFG5_THAPS	y7	3
778.355	1198.55	26.3	38.23	42.23	DIEGTGNEFVGDFR	tr|B8CFG5|B8CFG5_THAPS	y11	2
778.355	1040.48	26.3	38.23	42.23	DIEGTGNEFVGDFR	tr|B8CFG5|B8CFG5_THAPS	y9	1
778.355	983.458	26.3	38.23	42.23	DIEGTGNEFVGDFR	tr|B8CFG5|B8CFG5_THAPS	y8	4
778.355	869.415	26.3	38.23	42.23	DIEGTGNEFVGDFR	tr|B8CFG5|B8CFG5_THAPS	y7	3
900.907	1445.62	29.9	45.8	49.8	NGAIDFGWDTFSDEVK	tr|B8CFG5|B8CFG5_THAPS	y12	3
900.907	1330.6	29.9	45.8	49.8	NGAIDFGWDTFSDEVK	tr|B8CFG5|B8CFG5_THAPS	y11	4
900.907	1183.53	29.9	45.8	49.8	NGAIDFGWDTFSDEVK	tr|B8CFG5|B8CFG5_THAPS	y10	1
900.907	940.426	29.9	45.8	49.8	NGAIDFGWDTFSDEVK	tr|B8CFG5|B8CFG5_THAPS	y8	2
885.423	1377.7	29.5	42	46	DNYYPGDVGFDPLGLK	tr|B8CGG1|B8CGG1_THAPS	y13
885.423	1214.64	29.5	42	46	DNYYPGDVGFDPLGLK	tr|B8CGG1|B8CGG1_THAPS	y12
885.423	1117.59	29.5	42	46	DNYYPGDVGFDPLGLK	tr|B8CGG1|B8CGG1_THAPS	y11
885.423	1060.57	29.5	42	46	DNYYPGDVGFDPLGLK	tr|B8CGG1|B8CGG1_THAPS	y10
885.423	230.077	29.5	42	46	DNYYPGDVGFDPLGLK	tr|B8CGG1|B8CGG1_THAPS	b2
885.423	393.14	29.5	42	46	DNYYPGDVGFDPLGLK	tr|B8CGG1|B8CGG1_THAPS	b3
478.219	737.325	17.3	6.43	10.43	AFADM[+16.0]QTR	tr|B8CGG1|B8CGG1_THAPS	y6	2
478.219	673.326	17.3	6.43	10.43	AFADM[+16.0]QTR	tr|B8CGG1|B8CGG1_THAPS	y6	1
478.219	666.288	17.3	6.43	10.43	AFADM[+16.0]QTR	tr|B8CGG1|B8CGG1_THAPS	y5	5
478.219	602.289	17.3	6.43	10.43	AFADM[+16.0]QTR	tr|B8CGG1|B8CGG1_THAPS	y5	4
478.219	551.261	17.3	6.43	10.43	AFADM[+16.0]QTR	tr|B8CGG1|B8CGG1_THAPS	y4	6
478.219	219.113	17.3	6.43	10.43	AFADM[+16.0]QTR	tr|B8CGG1|B8CGG1_THAPS	b2
644.823	1016.53	22.2	14.91	18.91	AGGSSEPVTGLADK	Biognosys|iRT-Kit_WR	y10
644.823	800.451	22.2	14.91	18.91	AGGSSEPVTGLADK	Biognosys|iRT-Kit_WR	y8
644.823	604.33	22.2	14.91	18.91	AGGSSEPVTGLADK	Biognosys|iRT-Kit_WR	y6
683.828	966.453	23.4	19.58	23.58	VEATFGVDESANK	Biognosys|iRT-Kit_WR	y9
683.828	819.384	23.4	19.58	23.58	VEATFGVDESANK	Biognosys|iRT-Kit_WR	y8
683.828	663.294	23.4	19.58	23.58	VEATFGVDESANK	Biognosys|iRT-Kit_WR	y6
547.298	817.441	19.3	23.06	27.06	YILAGVESNK	Biognosys|iRT-Kit_WR	y8
547.298	704.357	19.3	23.06	27.06	YILAGVESNK	Biognosys|iRT-Kit_WR	y7
547.298	633.32	19.3	23.06	27.06	YILAGVESNK	Biognosys|iRT-Kit_WR	y6
669.838	1041.5	23	25.95	29.95	TPVISGGPYYER	Biognosys|iRT-Kit_WR	y9
669.838	928.416	23	25.95	29.95	TPVISGGPYYER	Biognosys|iRT-Kit_WR	y8
669.838	841.384	23	25.95	29.95	TPVISGGPYYER	Biognosys|iRT-Kit_WR	y7
683.854	1069.53	23.4	27.7	31.7	TPVITGAPYYER	Biognosys|iRT-Kit_WR	y9
683.854	956.447	23.4	27.7	31.7	TPVITGAPYYER	Biognosys|iRT-Kit_WR	y8
683.854	855.4	23.4	27.7	31.7	TPVITGAPYYER	Biognosys|iRT-Kit_WR	y7
699.338	926.473	23.9	31.61	35.61	GDLDAASYYAPVR	Biognosys|iRT-Kit_WR	y8
699.338	855.436	23.9	31.61	35.61	GDLDAASYYAPVR	Biognosys|iRT-Kit_WR	y7
699.338	605.341	23.9	31.61	35.61	GDLDAASYYAPVR	Biognosys|iRT-Kit_WR	y5
726.836	1066.48	24.7	36.57	40.57	DAVTPADFSEWSK	Biognosys|iRT-Kit_WR	y9
726.836	969.431	24.7	36.57	40.57	DAVTPADFSEWSK	Biognosys|iRT-Kit_WR	y8
726.836	898.394	24.7	36.57	40.57	DAVTPADFSEWSK	Biognosys|iRT-Kit_WR	y7
726.836	584.269	24.7	36.57	40.57	DAVTPADFSEWSK	Biognosys|iRT-Kit_WR	y10
622.854	826.478	21.6	41.63	45.63	TGFIIDPGGVIR	Biognosys|iRT-Kit_WR	y8
622.854	713.394	21.6	41.63	45.63	TGFIIDPGGVIR	Biognosys|iRT-Kit_WR	y7
622.854	598.367	21.6	41.63	45.63	TGFIIDPGGVIR	Biognosys|iRT-Kit_WR	y6
636.869	854.509	22	44.83	48.83	GTFIIDPAAIVR	Biognosys|iRT-Kit_WR	y8
636.869	741.425	22	44.83	48.83	GTFIIDPAAIVR	Biognosys|iRT-Kit_WR	y7
636.869	626.398	22	44.83	48.83	GTFIIDPAAIVR	Biognosys|iRT-Kit_WR	y6
776.93	1051.56	26.2	46.93	50.93	FLLQFGAQGSPLFK	Biognosys|iRT-Kit_WR	y10
776.93	904.489	26.2	46.93	50.93	FLLQFGAQGSPLFK	Biognosys|iRT-Kit_WR	y9
776.93	504.318	26.2	46.93	50.93	FLLQFGAQGSPLFK	Biognosys|iRT-Kit_WR	y4
487.257	860.422	17.5	6.06	10.06	LGGNETQVR	Biognosys|iRT-Kit_WR	y8
487.257	803.401	17.5	6.06	10.06	LGGNETQVR	Biognosys|iRT-Kit_WR	y7
487.257	503.294	17.5	6.06	10.06	LGGNETQVR	Biognosys|iRT-Kit_WR	y4
